# Supplementary material
Source: publisher figshare collection journal article supplement (https://future-science-group.figshare.com/articles/dataset/_/22698784)

Figure Supporting Materials 3: Answers to the question I was given written information explaining what the results mean to me.

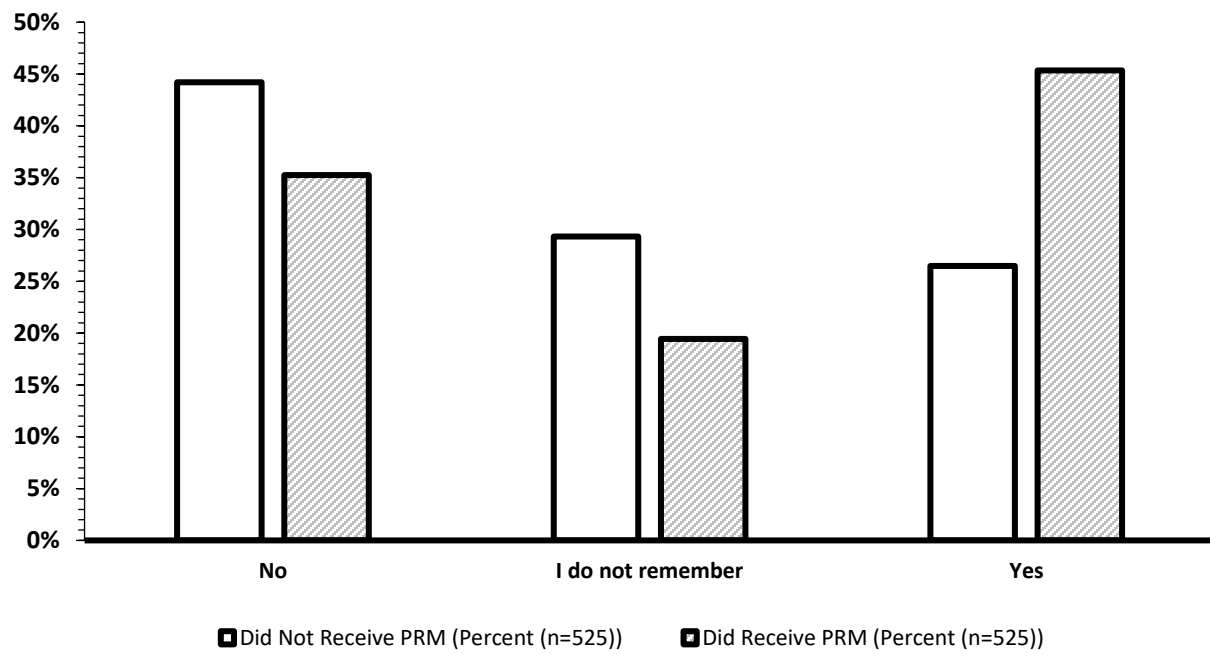

Supplement: Supplementary file 1 [file 1]
