# Supplementary material
Source: publisher figshare collection journal article supplement (https://future-science-group.figshare.com/articles/dataset/_/22698784)
Supplement: Supplementary file 2 [file 1]

Supporting Materials: Table 1: List of all questions and answer options included in this survey.

- 
1. Who contacted you about your Pharmacogenetic (PGx) results?
    - My doctor
    - A pharmacist
    - A genetic counselor
    - A nurse
    - I have not been contacted
    - I do not remember who contacted me
  2. I was given written information explaining what the results mean to me.
    - Yes
    - No
    - I do not remember
  3. I was given access to a video explaining what the results mean to me.
    - Yes
    - No
    - I do not remember
  4. I feel confident in knowing how my genetic results can help with my medication decisions.
    - Strongly Disagree
    - Disagree
    - Neither Agree or Disagree
    - Agree
    - Strongly Agree
  5. How satisfied are you with how your PGx results were returned to you?
    - Very dissatisfied
    - Dissatisfied
    - Neither Satisfied or dissatisfied
    - Satisfied
    - Very satisfied
  6. How do you prefer to be contacted with PGx results? (Check all that apply)
    - MyChart Message
    - Telephone Call
    - Mail
    - In person
    - Other – please specify
    - I would prefer not to be contacted with PGx results
  7. How satisfied are you with the explanation you received about your PGx results?
    - Very dissatisfied
    - Dissatisfied
    - Neither Satisfied or dissatisfied
    - Satisfied
    - Very satisfied
  8. If a friend was interested in having PGx testing, how likely are you to recommend they have it done?
    - Very unlikely
    - Unlikely
    - Likely
    - Very likely
