# Supplementary material
Source: publisher figshare collection journal article supplement (https://future-science-group.figshare.com/articles/dataset/_/22698784)

Figure Supporting Materials 6: Discrete answers to the question: How do you prefer to be contacted with Pharmacogenomics (PGx) results? (Please select all that apply)

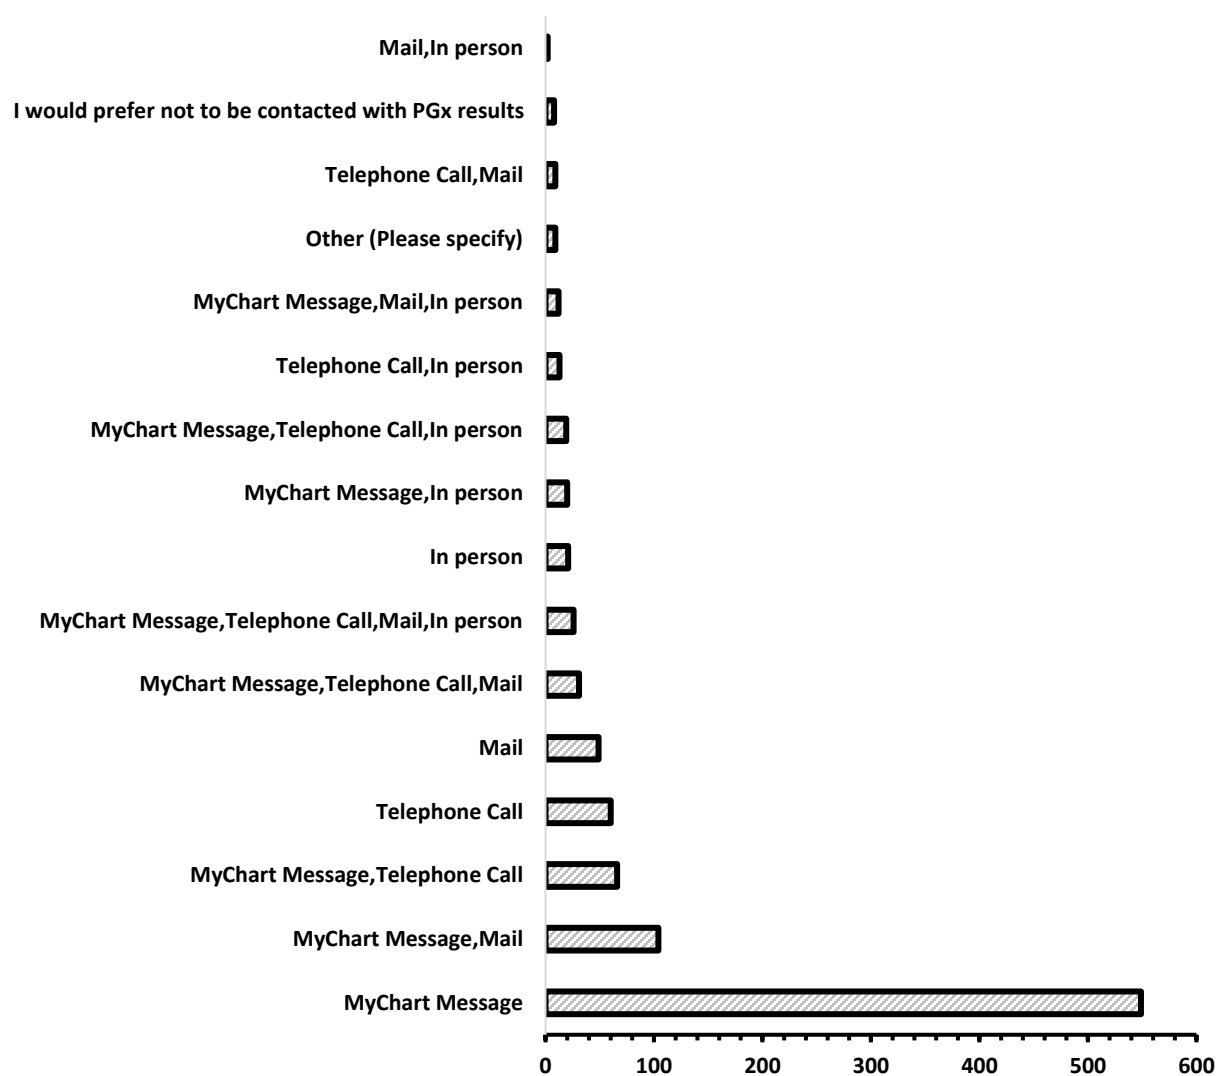

Supplement: Supplementary file 3 [file 1]
