# Supplementary material
Source: publisher figshare collection journal article supplement (https://future-science-group.figshare.com/articles/dataset/_/22698784)

Figure Supporting Materials 2: Answers to the question: Who contacted you about your Pharmacogenomics (PGx) results?

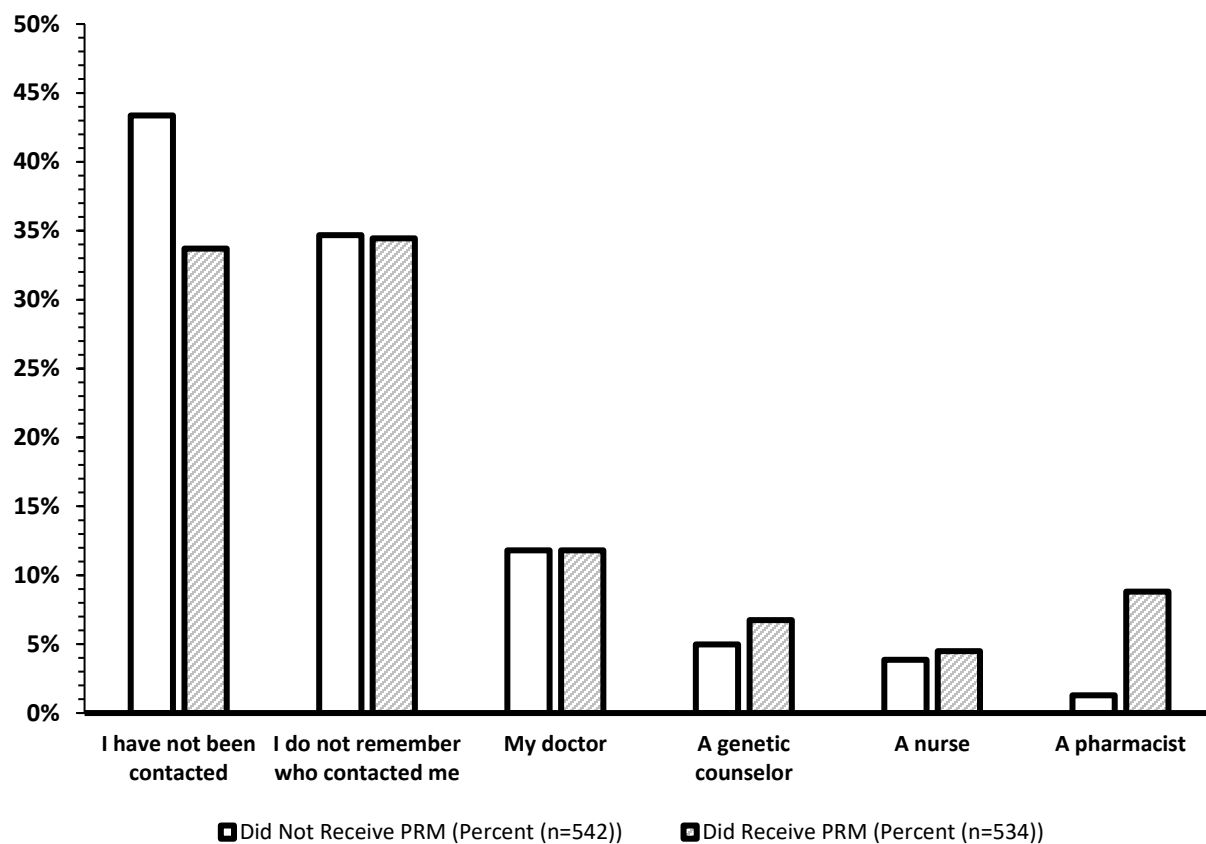

Supplement: Supplementary file 4 [file 1]
