# Supplementary material
Source: publisher figshare collection journal article supplement (https://future-science-group.figshare.com/articles/dataset/_/22698784)

Figure Supporting Materials 5: Answers to the question: If a friend was interested in having Pharmacogenomics (PGx) testing, how likely are you to recommend they have it done?

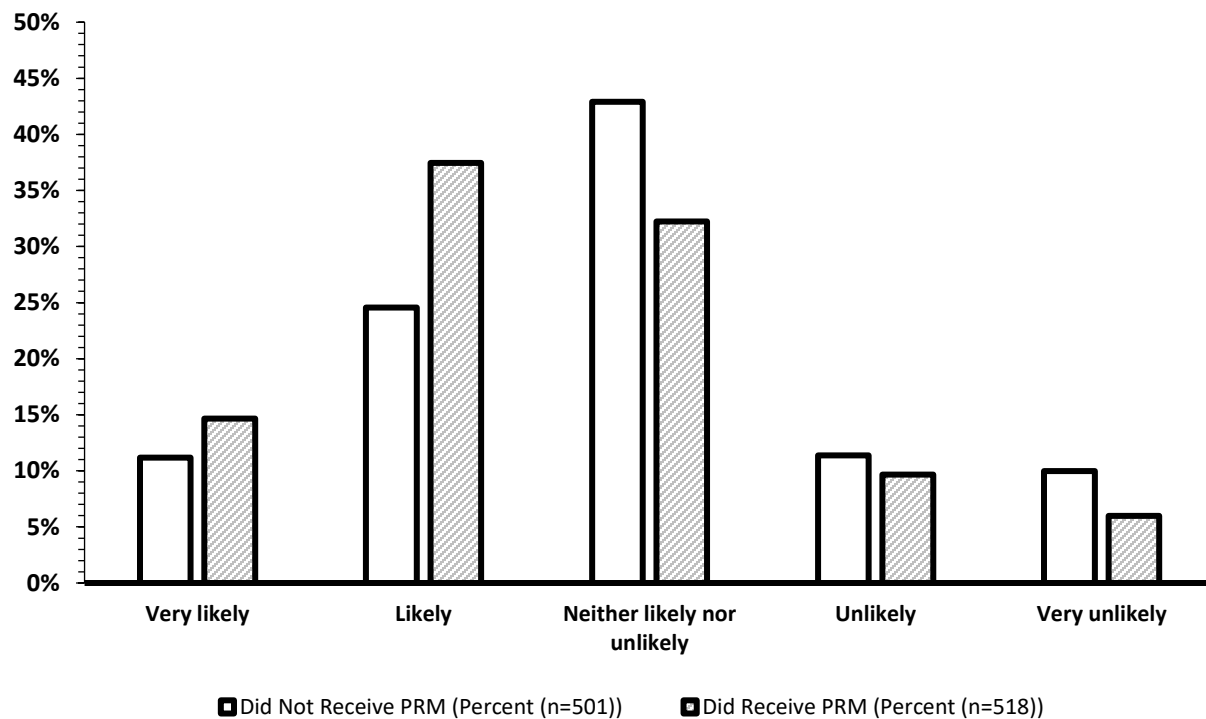

Supplement: Supplementary file 6 [file 1]
