# Supplementary material
Source: publisher figshare collection journal article supplement (https://future-science-group.figshare.com/articles/dataset/_/22698784)
Supplement: Supplementary file 7 [file 1]

Figure Supporting Materials 7: Comparison of the text of the PRM sent prior to adjusting the process of sending the message to all panel-based testing patients.

**Initial Text of the PRM (only to non-actionable result patients):**

Dear \*\*\*,

A clinical pharmacist has reviewed your pharmacogenomic test results, and based on your current medication list and clinical guidelines there are no recommendations for change.

Your PGx results will **guide** your doctor's recommendations for starting medications or starting dose as this information cannot predict a specific medication or response. External factors like diet or other medications you are taking may also influence how you respond to medication.

Your pharmacogenomic test results are available for viewing in your MyChart profile under lab results or you can view potentially impacted medications by going to the "Health" dropdown menu and selecting "Genetic Profile".

It is very important that your healthcare team knows exactly which medications you are taking. This includes medications prescribed by your doctor or those you can buy without a prescription (examples: herbal supplements, pain relievers, or antacids). If you notice anything incorrect on your medication list, please feel free to call an Imagenetics pharmacist at 605-312-4363 to set up an appointment to update your medication list.

Please click here for a video describing how pharmacogenomics can affect you.

<https://www.sanfordhealth.org/videos/pharmacogenomics-and-you>

For more information on what a metabolizer status might mean to you click here.

<https://www.sanfordhealth.org/videos/sanford-pharmacogenomics-phenotypes>

**Updated Text of the PRM (sent to all panel based PGx testing patients):**

Dear @NAME@,

A pharmacist has reviewed your pharmacogenomics (PGx) test results. If the PGx results impact any of your medications, your doctor will be notified. Your genes are one of many factors affecting how medications work, and your provider may or may not decide to change your medications at this time.

Your PGx results will remain part of your medical record. They may be used to help guide your doctor in choosing the best medication and dose for you in the future.

Follow the steps below to access your Genetic Profile:

1. Log in to your My Sanford Chart account
2. Select the Menu icon
3. Find the My Record section
4. Click Genetic Profile

Your healthcare team must know which medications you are taking. This includes medications your doctor prescribes or those you can buy without a prescription, such as herbal supplements, pain relievers, or antacids.

If you have any updates to your medication lists call (605)-312-GENE (4363)

If you would like to schedule an appointment with the PGx Clinic call (605)-404-4000

For more information:

To learn how pharmacogenomics can affect you, click this link and watch a video.

<https://www.sanfordhealth.org/videos/pharmacogenomics-and-you>

To learn what a metabolizer status might mean to you, click this link, and watch a video.

<https://www.sanfordhealth.org/videos/sanford-pharmacogenomics-phenotypes>

Regards,

@signature@
